# Supplementary material for: Treatment and Prevention of Recurrent Clostridium difficile Infection with Functionalized Bovine Antibody-Enriched Whey in a Hamster Primary Infection Model
Source: Toxins (Basel). 2019 Feb 6;11(2):98. doi: 10.3390/toxins11020098 (PMC6409564; doi:10.3390/toxins11020098)
Supplement: Supplementary file 1 [file toxins-11-00098-s001.pdf]

Supplementary data regarding the treatment and prevention of recurrent *Clostridium difficile* infection with functionalized bovine antibody-enriched whey in a hamster primary infection model

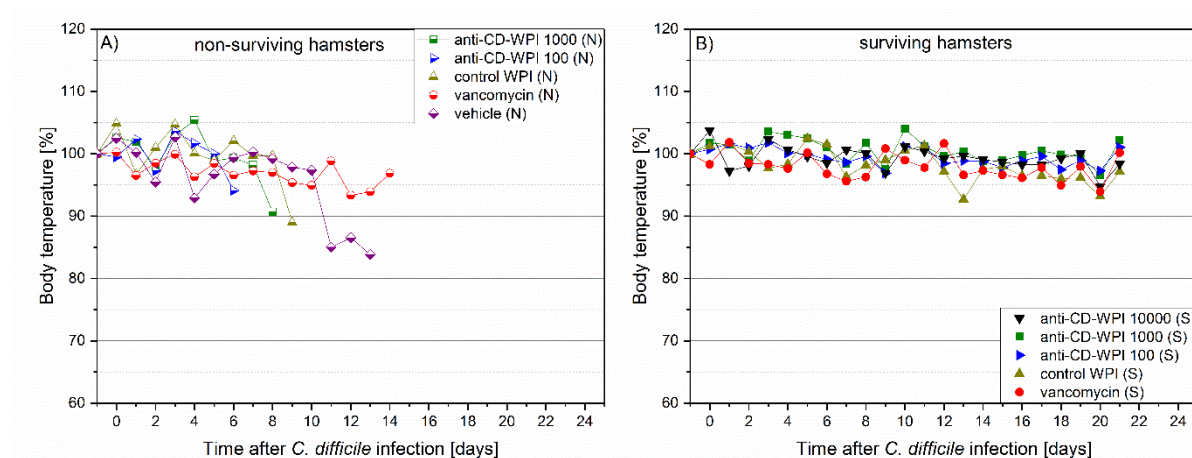

**Figure S1** Observation of hamster body-temperature between days -1 and +20: Mean percentage of body temperature relative to day -1. Individual lines summarize the average values obtained for: vehicle (rotated square), vancomycin (circle), control-WPI (triangle up), WPI 100 (triangle right), WPI 1,000 (square), and WPI 10,000 (triangle down). Filled symbols represent surviving (S) hamsters (B) and half-filled symbols indicate values of hamsters in individual groups that did not survive (N) due to CDI (A).

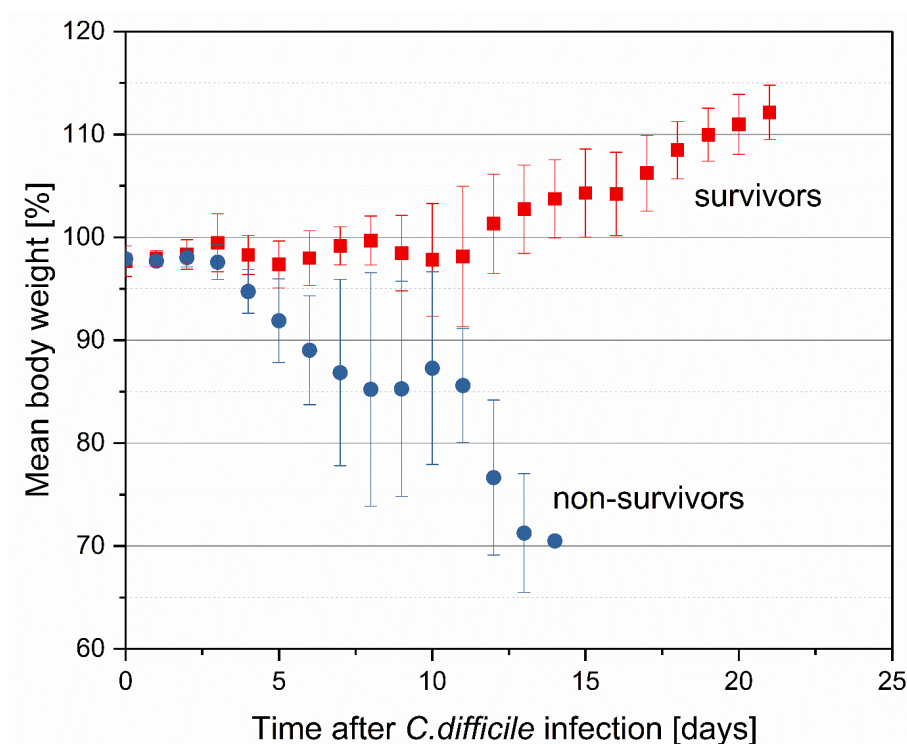

**Figure S2** Mean body weight  $\pm$  standard deviation related to the average weight on day -1 before any treatment. Squares (■) represents surviving hamster of all groups and circles (●) the hamster succumbed to the disease of independent of the applied treatment.

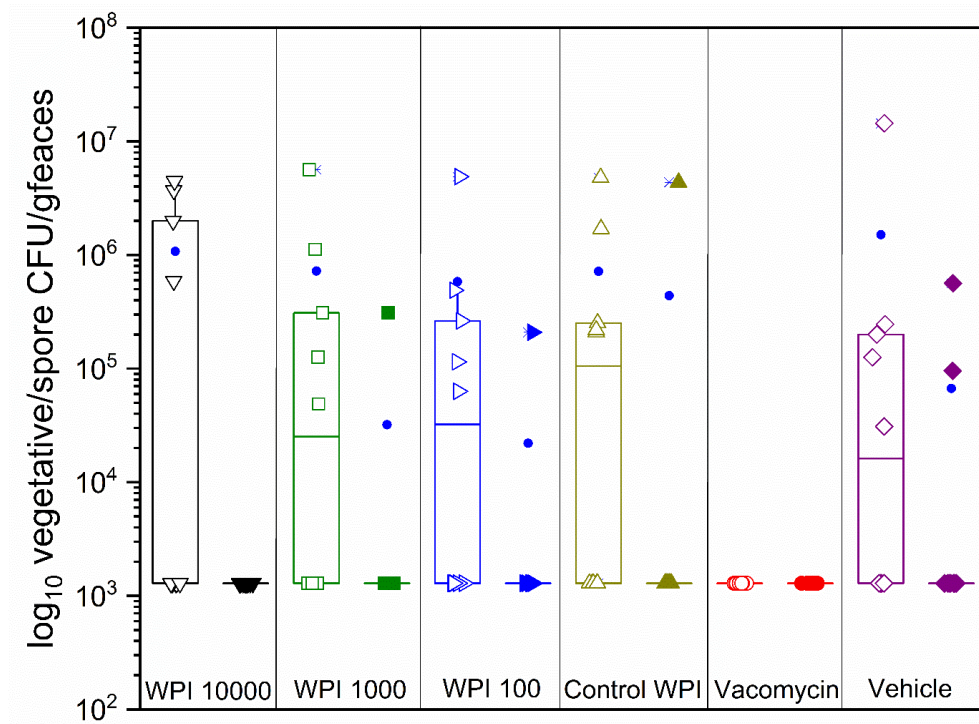

**Figure S3** Vegetative (open symbols) and spore (filled symbols) colony-forming units (CFU) of *C. difficile* per gram faeces of during the treatment with whey protein isolates 36hours post infection. The blue dot represents the mean. Detection limit was  $3.11 \log_{10}$  CFU/g.

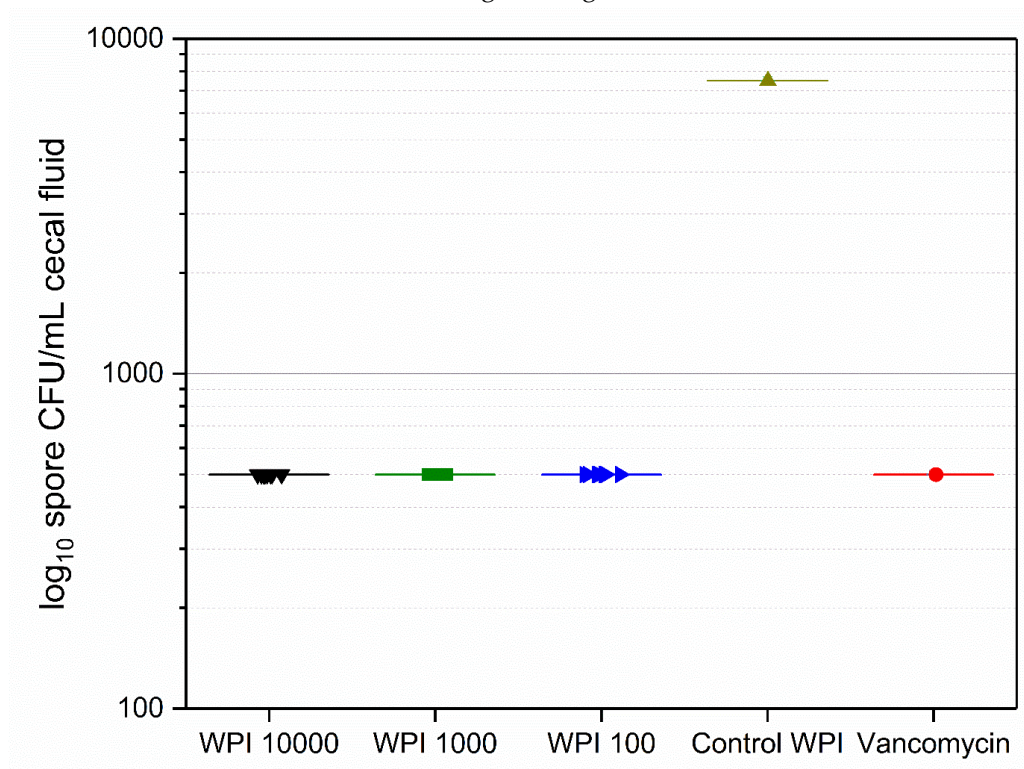

**Figure S4** Surviving hamster were euthanized at the end of the study. The figure shows the spore counts CFU/ml in the cecal fluid at the day 21. Detection limit was  $2.7 \log_{10}$  CFU/ml.

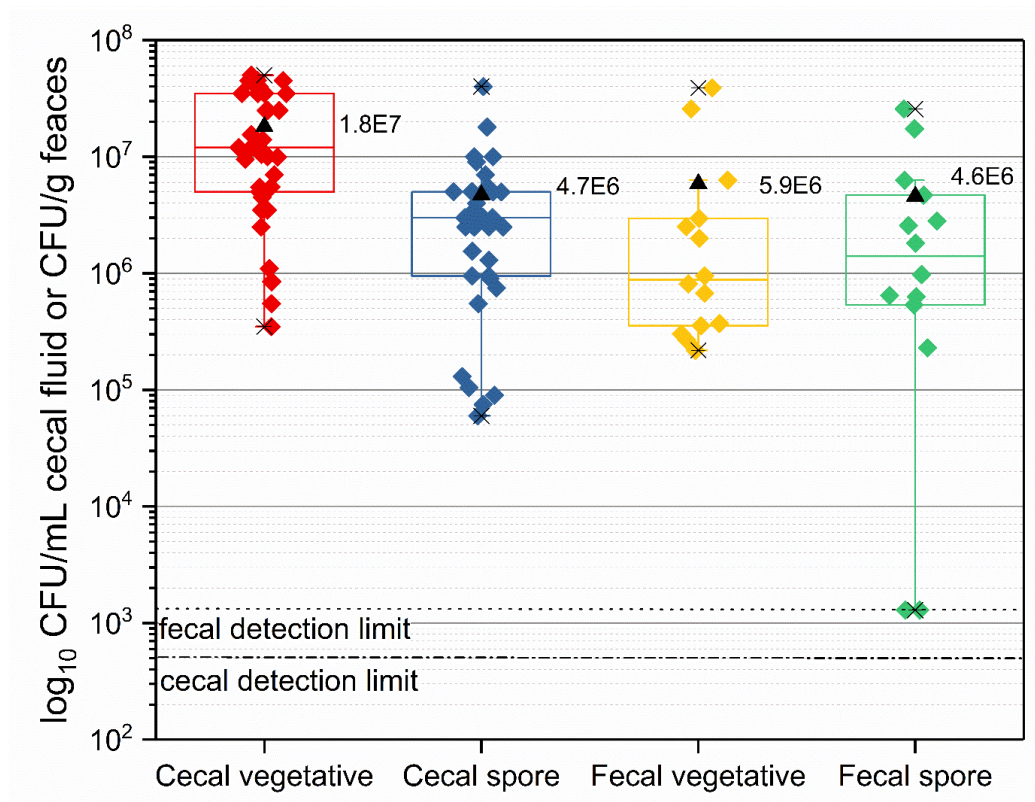

**Figure S5** CFU/g feces or ml cecal fluid at the day of death of hamster who succumbed to the disease independent of applied treatment. The detection limit was 3.11 log<sub>10</sub> CFU/g and 2.7 log<sub>10</sub> CFU/ml for cecal samples, respectively.

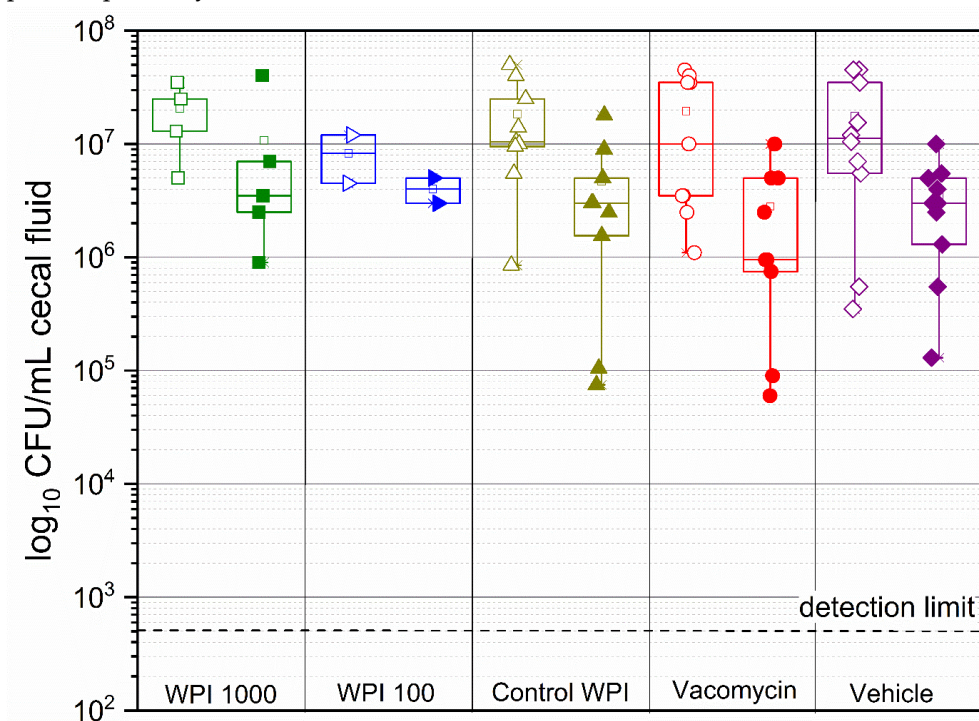

**Figure S6** CFU/ml cecal fluid at the day of death of hamster who succumbed to the disease for the different applied treatments. Open symbols vegetative counts, filled symbols spore counts. The detection limit was 2.7 log<sub>10</sub> CFU/ml

Table S1 Necropsy observation of cecum, ileum and colon

| Group    | USDA # | cecum obs.                                      |                           |                                                                | ileum obs.                              |                           |                                                                | colon obs.                              |                           |                                                                |
|----------|--------|-------------------------------------------------|---------------------------|----------------------------------------------------------------|-----------------------------------------|---------------------------|----------------------------------------------------------------|-----------------------------------------|---------------------------|----------------------------------------------------------------|
|          |        | Overall appearance                              | Edema (present or absent) | Echymotic hemorrhagic petechiae (present or absent) % coverage | Overall appearance                      | Edema (present or absent) | Echymotic hemorrhagic petechiae (present or absent) % coverage | Overall appearance                      | Edema (present or absent) | Echymotic hemorrhagic petechiae (present or absent) % coverage |
| WPI 1000 | 11622  | Pinkish-tan color w/ hemorrhagic spots; swollen | present                   | present, >60%                                                  | Tan color w/ hemorrhagic spots; swollen | present                   | <10%                                                           | (ascending) Opaque white color; swollen | present                   | 0                                                              |
|          | 11623  | Yellow-tan color w/ hemorrhagic spots; swollen  | present                   | present, <10%                                                  | Tan color w/ hemorrhagic spots; swollen | present                   | 10%                                                            | (ascending) Opaque white color; swollen | present                   | 0%                                                             |
|          | 11624  | normal, brown color                             | none                      | none                                                           | normal, brown color                     | none                      | none                                                           | normal, brown color                     | none                      | none                                                           |
|          | 11625  | normal, brown color                             | none                      | none                                                           | normal, brown color                     | none                      | none                                                           | normal, brown color                     | none                      | none                                                           |
|          | 11626  | Yellow-red color w/ hemorrhagic spots; swollen  | present                   | present, 40%                                                   | Tan color w/ hemorrhagic spots; swollen | present                   | <10%                                                           | (ascending) Opaque white color; swollen | present                   | 0                                                              |
|          | 11627  | Yellow-tan color w/ hemorrhagic spots; swollen  | present                   | present, <10%                                                  | Tan color w/ hemorrhagic spots; swollen | present                   | 10%                                                            | (ascending) Opaque white color; swollen | present                   | 0%                                                             |
|          | 11628  | normal, brown color                             | none                      | none                                                           | normal, brown color                     | none                      | none                                                           | normal, brown color                     | none                      | none                                                           |
|          | 11629  | normal, brown color                             | none                      | none                                                           | normal, brown color                     | none                      | none                                                           | normal, brown color                     | none                      | none                                                           |
|          | 11630  |                                                 |                           |                                                                |                                         |                           |                                                                |                                         |                           |                                                                |
|          | 11631  | Yellow-tan color w/ hemorrhagic spots; swollen  | present                   | present, <10%                                                  | Tan color w/ hemorrhagic spots; swollen | present                   | 10%                                                            | (ascending) Opaque                      | present                   | 0%                                                             |

|             |       |                                                                                          |         |               |                                                |         |      |                                               |         |      |
|-------------|-------|------------------------------------------------------------------------------------------|---------|---------------|------------------------------------------------|---------|------|-----------------------------------------------|---------|------|
|             |       |                                                                                          |         |               |                                                |         |      | white color;<br>swollen                       |         |      |
|             | 11632 | normal, brown color                                                                      | none    | none          | normal, brown color                            | none    | none | normal, brown color                           | none    | none |
|             | 11633 | normal, brown color                                                                      | none    | none          | normal, brown color                            | none    | none | normal, brown color                           | none    | none |
|             | 11634 | Pink-red color w/<br>hemorrhagic spots; swollen                                          | present | present, 10%  | Red-tan color w/<br>hemorrhagic spots; swollen | present | 40%  | (ascending)<br>Opaque white color;<br>swollen | present | 0    |
|             | 11635 | normal, brown color                                                                      | none    | none          | normal, brown color                            | none    | none | normal, brown color                           | none    | none |
| WPI 100     | 11636 | Yellow-tan color w/<br>hemorrhagic spots; swollen<br>(contents are viscous, mucous-like) | present | present, <10% | Tan color w/<br>hemorrhagic spots; swollen     | present | 10%  | (ascending)<br>Opaque white color;<br>swollen | present | 0%   |
|             | 11637 | normal, brown color                                                                      | none    | none          | normal, brown color                            | none    | none | normal, brown color                           | none    | none |
|             | 11638 | normal, brown color                                                                      | none    | none          | normal, brown color                            | none    | none | normal, brown color                           | none    | none |
|             | 11639 | normal, brown color                                                                      | none    | none          | normal, brown color                            | none    | none | normal, brown color                           | none    | none |
|             | 11640 | normal, brown color                                                                      | none    | none          | normal, brown color                            | none    | none | normal, brown color                           | none    | none |
|             | 11641 | normal, brown color                                                                      | none    | none          | normal, brown color                            | none    | none | normal, brown color                           | none    | none |
|             | 11642 | normal, brown color                                                                      | none    | none          | normal, brown color                            | none    | none | normal, brown color                           | none    | none |
| control WPI | 11643 | Pink-red color w/<br>hemorrhagic spots; swollen                                          | present | present, 10%  | Red-tan color w/<br>hemorrhagic spots; swollen | present | 40%  | (ascending)<br>Opaque white color;<br>swollen | present | 0    |

|           |       |                                                  |         |               |                                         |         |      |                                            |         |      |
|-----------|-------|--------------------------------------------------|---------|---------------|-----------------------------------------|---------|------|--------------------------------------------|---------|------|
|           | 11644 | Brown-red color w/ hemorrhagic spots; swollen    | present | present, >70% | Tan color w/ hemorrhagic spots; swollen | present | <10% | (ascending)<br>Opaque white color; swollen | present | 0%   |
|           | 11645 | Brownish-tan color w/ hemorrhagic spots; swollen | present | present, >70% | Tan color w/ hemorrhagic spots; swollen | present | <10% | (ascending)<br>Opaque white color; swollen | present | 0%   |
|           | 11646 | Brownish-tan color w/ hemorrhagic spots; swollen | present | present, 40%  | Tan color w/ hemorrhagic spots; swollen | present | <10% | (ascending)<br>Opaque white color; swollen | present | 0%   |
|           | 11647 | Yellow-tan color w/ hemorrhagic spots; swollen   | present | present, 30%  | Tan color w/ hemorrhagic spots; swollen | present | <10% | (ascending)<br>Opaque white color; swollen | present | 0%   |
|           | 11648 | Brown-red color w/ hemorrhagic spots; swollen    | present | present, >70% | Tan color w/ hemorrhagic spots; swollen | present | <10% | (ascending)<br>Opaque white color; swollen | present | 0%   |
|           | 11649 | Yellow-tan color w/ hemorrhagic spots; swollen   | present | present, <10% | Tan color w/ hemorrhagic spots; swollen | present | 10%  | (ascending)<br>Opaque white color; swollen | present | 0%   |
|           | 11650 | Dark brownish-red                                | present | present, 80%  | Tan color w/ hemorrhagic spots; swollen | present | 10%  | (ascending)<br>Opaque white color; swollen | present | 0%   |
|           | 11651 | Brownish-tan color w/ hemorrhagic spots; swollen | present | present, >70% | Tan color w/ hemorrhagic spots; swollen | present | <10% | (ascending)<br>Opaque white color; swollen | present | 0    |
| WPI 10000 | 11652 | normal, brown color                              | none    | none          | normal, brown color                     | none    | none | normal, brown color                        | none    | none |
|           | 11653 | normal, brown color                              | none    | none          | normal, brown color                     | none    | none | normal, brown color                        | none    | none |

|            |       |                                                |         |               |                                         |         |      |                                            |         |      |
|------------|-------|------------------------------------------------|---------|---------------|-----------------------------------------|---------|------|--------------------------------------------|---------|------|
|            | 11654 | normal, brown color                            | none    | none          | normal, brown color                     | none    | none | normal, brown color                        | none    | none |
|            | 11655 | normal, brown color                            | none    | none          | normal, brown color                     | none    | none | normal, brown color                        | none    | none |
|            | 11656 | normal, brown color                            | none    | none          | normal, brown color                     | none    | none | normal, brown color                        | none    | none |
|            | 11657 | normal, brown color                            | none    | none          | normal, brown color                     | none    | none | normal, brown color                        | none    | none |
|            | 11658 | normal, brown color                            | none    | none          | normal, brown color                     | none    | none | normal, brown color                        | none    | none |
|            | 11659 | normal, brown color                            | none    | none          | normal, brown color                     | none    | none | normal, brown color                        | none    | none |
|            | 11660 | normal, brown color                            | none    | none          | normal, brown color                     | none    | none | normal, brown color                        | none    | none |
|            | 11661 | normal, brown color                            | none    | none          | normal, brown color                     | none    | none | normal, brown color                        | none    | none |
| Vancomycin | 11662 | Brown-red color w/ hemorrhagic spots; swollen  | present | present, >70% | Tan color w/ hemorrhagic spots; swollen | present | <10% | (ascending)<br>Opaque white color; swollen | present | 0%   |
|            | 11663 | Brown-red color w/ hemorrhagic spots; swollen  | present | present, 50%  | Tan color w/ hemorrhagic spots; swollen | present | <10% | (ascending)<br>Opaque white color; swollen | present | 0%   |
|            | 11664 | Brown-red color w/ hemorrhagic spots; swollen  | present | present, >75% | Tan color w/ hemorrhagic spots; swollen | present | <10% | (ascending)<br>Opaque white color; swollen | present | 0%   |
|            | 11665 | Yellow-tan color w/ hemorrhagic spots; swollen | present | present, <10% | Tan color w/ hemorrhagic spots; swollen | present | 10%  | (ascending)<br>Opaque white color; swollen | present | 0%   |
|            | 11666 | normal, brown color                            | none    | none          | normal, brown color                     | none    | none | normal, brown color                        | none    | none |

|         |       |                                                        |         |                 |                                             |         |      |                                            |         |    |
|---------|-------|--------------------------------------------------------|---------|-----------------|---------------------------------------------|---------|------|--------------------------------------------|---------|----|
| Vehicle | 11667 | Light Brownish-tan color w/ hemorrhagic spots; swollen | present | present, 30%    | Tan color w/ hemorrhagic spots; swollen     | present | <10% | (ascending)<br>Opaque white color; swollen | present | 0% |
|         | 11668 | Pink-red color w/ hemorrhagic spots; swollen           | present | present, 10%    | Red-tan color w/ hemorrhagic spots; swollen | present | 40%  | (ascending)<br>Opaque white color; swollen | present | 0  |
|         | 11669 | Brown-red color w/ hemorrhagic spots; swollen          | present | present, >60%   | Tan color w/ hemorrhagic spots; swollen     | present | <10% | (ascending)<br>Opaque white color; swollen | present | 0% |
|         | 11670 | Brown-red color w/ hemorrhagic spots; swollen          | present | present, >80%   | Tan color w/ hemorrhagic spots; swollen     | present | <10% | (ascending)<br>Opaque white color; swollen | present | 0% |
|         | 11671 | Pink-red color w/ hemorrhagic spots; swollen           | present | present, 10%    | Red-tan color w/ hemorrhagic spots; swollen | present | 40%  | (ascending)<br>Opaque white color; swollen | present | 0  |
|         | 11672 | Yellow-tan color w/ hemorrhagic spots; swollen         | present | present, <10%   | Tan color w/ hemorrhagic spots; swollen     | present | 10%  | (ascending)<br>Opaque white color; swollen | present | 0% |
|         | 11673 | Yellow-tan color w/ hemorrhagic spots; swollen         | present | present, <10%   | Tan color w/ hemorrhagic spots; swollen     | present | 10%  | (ascending)<br>Opaque white color; swollen | present | 0% |
|         | 11674 | Brownish-tan color w/ hemorrhagic spots; swollen       | present | present, 20-30% | Tan color w/ hemorrhagic spots; swollen     | present | <10% | (ascending)<br>Opaque white color; swollen | present | 0% |
|         | 11675 | Brown-red color w/ hemorrhagic spots; swollen          | present | present, <10%   | Tan color w/ hemorrhagic spots; swollen     | present | <10% | (ascending)<br>Opaque white color; swollen | present | 0% |

|       |                                                        |         |                 |                                         |         |      |                                            |         |    |
|-------|--------------------------------------------------------|---------|-----------------|-----------------------------------------|---------|------|--------------------------------------------|---------|----|
| 11676 | Brownish-tan color w/ hemorrhagic spots; swollen       | present | present, 20-30% | Tan color w/ hemorrhagic spots; swollen | present | <10% | (ascending)<br>Opaque white color; swollen | present | 0% |
| 11677 | Brown-red color w/ hemorrhagic spots; swollen          | present | present, 50%    | Tan color w/ hemorrhagic spots; swollen | present | <10% | (ascending)<br>Opaque white color; swollen | present | 0% |
| 11678 | Brownish-tan color w/ hemorrhagic spots; swollen       | present | present, 30%    | Tan color w/ hemorrhagic spots; swollen | present | 10%  | (ascending)<br>Opaque white color; swollen | present | 0% |
| 11679 | Light Brownish-tan color w/ hemorrhagic spots; swollen | present | present, 10-20% | Tan color w/ hemorrhagic spots; swollen | present | <10% | (ascending)<br>Opaque white color; swollen | present | 0% |
| 11680 | Yellow-tan color w/ hemorrhagic spots; swollen         | present | present, <10%   | Tan color w/ hemorrhagic spots; swollen | present | 10%  | (ascending)<br>Opaque white color; swollen | present | 0% |
| 11681 | Brownish-tan color w/ hemorrhagic spots; swollen       | present | present, <60%   | Tan color w/ hemorrhagic spots; swollen | present | 10%  | (ascending)<br>Opaque white color; swollen | present | 0% |
